# Supplementary material for: The network formation assay: a spatially standardized neurite outgrowth analytical display for neurotoxicity screening
Source: Royal Society of Chemistry journal article supplement (doi:10.1039/b922193j), 2010-01-01
Supplement: b922193j.pdf [file b922193j.pdf]

## The network formation assay: a spatially standardized neurite outgrowth analytical display for neurotoxicity screening

Jean-Philippe Frimat<sup>a†</sup>, Julia Sisnaiske<sup>b†</sup>, Subanatarajan Subbiah<sup>c</sup>, Heike Menne<sup>a</sup>,  
Patricio Godoy<sup>b</sup>, Peter Lampen<sup>a</sup>, Marcel Leist<sup>d</sup>, Joachim Franzke<sup>a</sup>, Jan G. Hengstler<sup>b</sup>,  
Christoph van Thriel<sup>b\*</sup> and Jonathan West<sup>a\*</sup>

<sup>a</sup> ISAS – Institute for Analytical Sciences, Otto-Hahn-Str. 6b, D-44227 Dortmund, Germany.

<sup>b</sup> Leibniz Research Centre for Working Environment and Human Factors at the University of Dortmund (IfADo), Ardeystr. 67, D-44139 Dortmund, Germany.

<sup>c</sup> Fakultät Bio- und Chemieingenieurwesen, Lehrstuhl für Systemdynamik und Prozessführung, Technische Universität Dortmund, D-44221, Dortmund, Germany.

<sup>d</sup> Department of Biology, Universität Konstanz, Postfach M633, D-78457 Konstanz, Germany.

† These authors contributed equally to the research.

\* These senior authors contributed equally to the research.

Correspondence to: [thriel@ifado.de](mailto:thriel@ifado.de); [west@isas.de](mailto:west@isas.de)

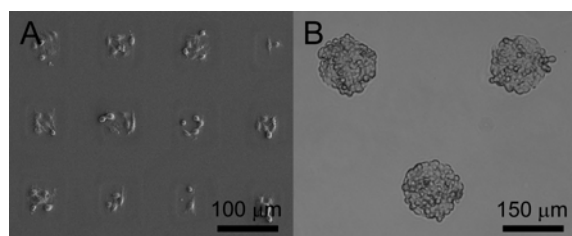

Fig. S1 MCF-7 and HT29 cell patterns.

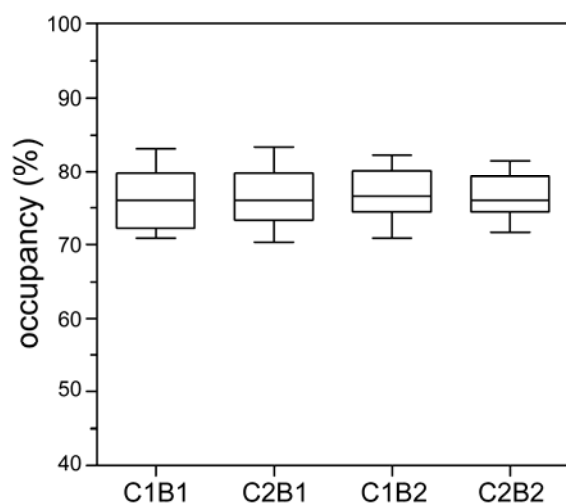

Fig. S2 Chip to chip (C) and batch to batch (B) pattern occupancy variations.

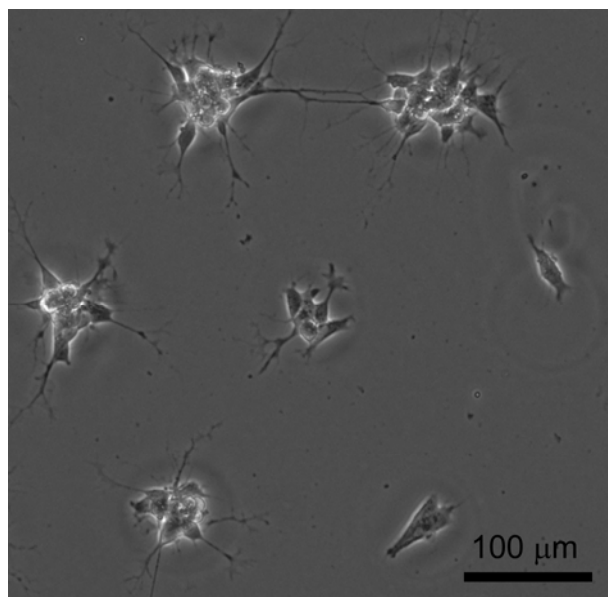

**Fig. S3** Neuronal network at 24 h.

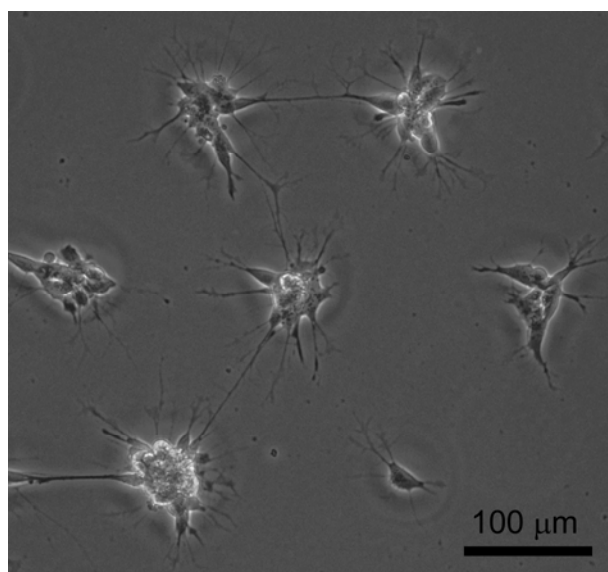

**Fig. S4** Neuronal network at 48 h.

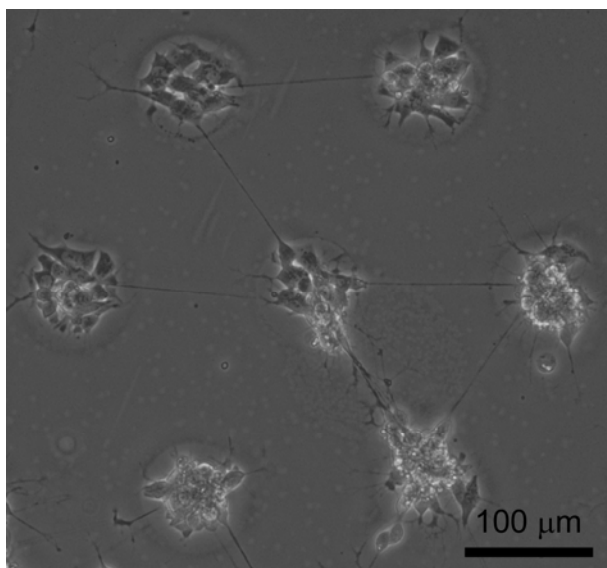

**Fig. S5** Neuronal network at 72 h.

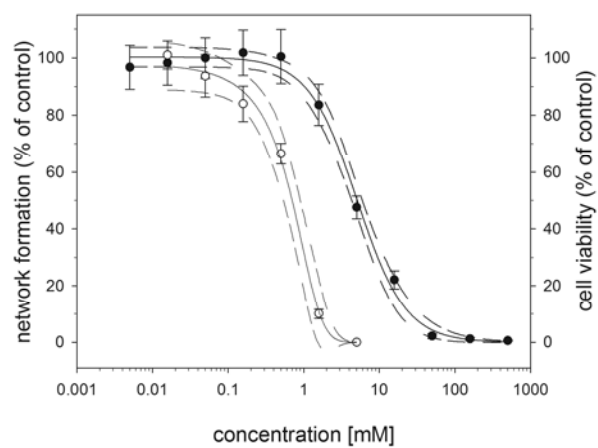

**Fig. S6** NFA reproducibility.

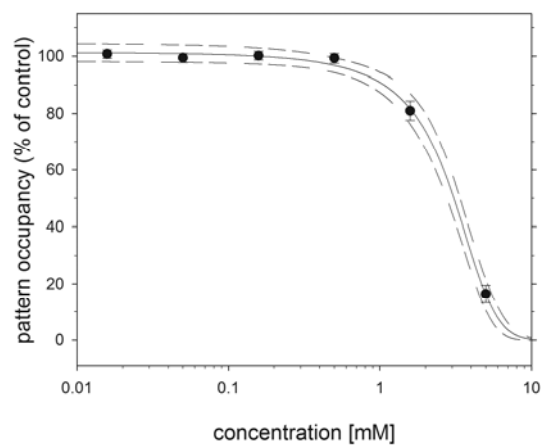

**Fig. S7** Pattern occupancy can be used to measure cytotoxicity.
